# Supplementary material for: A vitrified film of an anisometric europium(iii) β-diketonate complex with a low melting point as a reusable luminescent temperature probe with excellent sensitivity in the range of 270–370 K
Source: Royal Society of Chemistry journal article supplement (doi:10.1039/d0tc00625d), 2020-01-01
Supplement: d0tc00625d1.pdf [file d0tc00625d1.pdf]

**Electronic Supplementary Information (ESI) for**

**A vitrified film of an anisometric europium(III)  $\beta$ -diketonate complex with low melting point as a reusable luminescence temperature probe with excellent sensitivity in the range of 270-370 K**

Dmitry V. Lapaev<sup>a,\*</sup>, Victor G. Nikiforov<sup>a</sup>, Vladimir S. Lobkov<sup>a</sup>, Andrey A. Knyazev<sup>b</sup>,  
Ruzanna M. Ziyatdinova<sup>b</sup>, Yury G. Galyametdinov<sup>ab</sup>

<sup>a</sup>Zavoisky Physical-Technical Institute, FRC Kazan Scientific Center of RAS, Sibirsky trakt str., 10/7, 420029, Kazan, Russia. E-mail: [d\\_lapaev@mail.ru](mailto:d_lapaev@mail.ru)

<sup>b</sup>Kazan National Research Technological University, K. Marx str., 68, 420015, Kazan, Russia

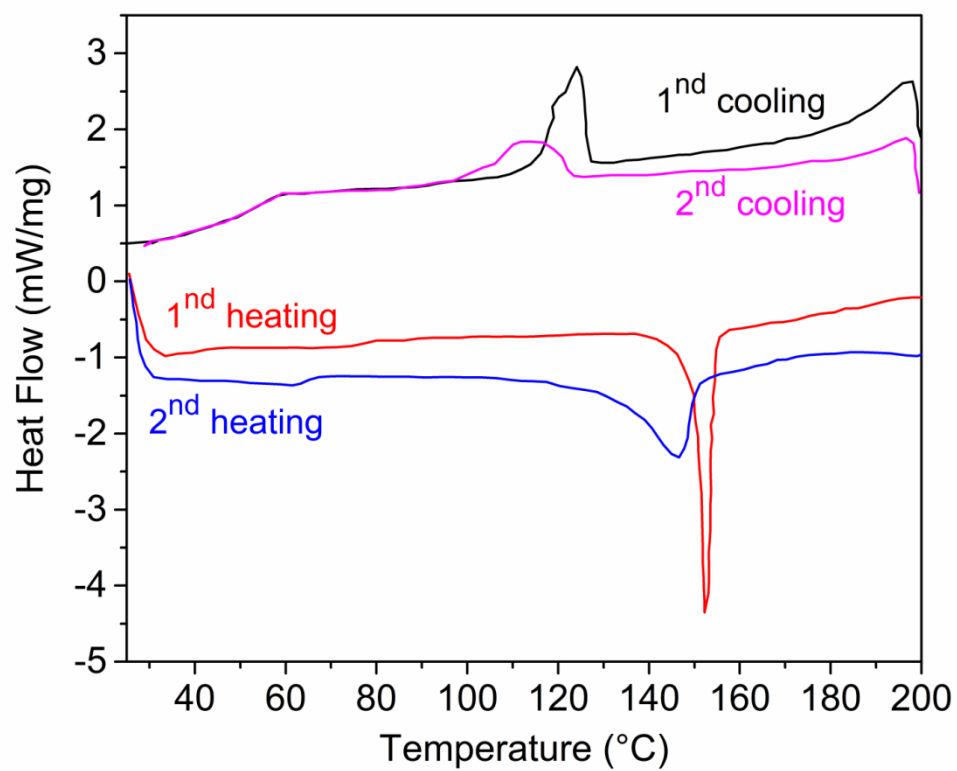

**Fig. S1** DSC thermograms of the Eu(DK<sub>12-14</sub>)<sub>3</sub>phen complex.

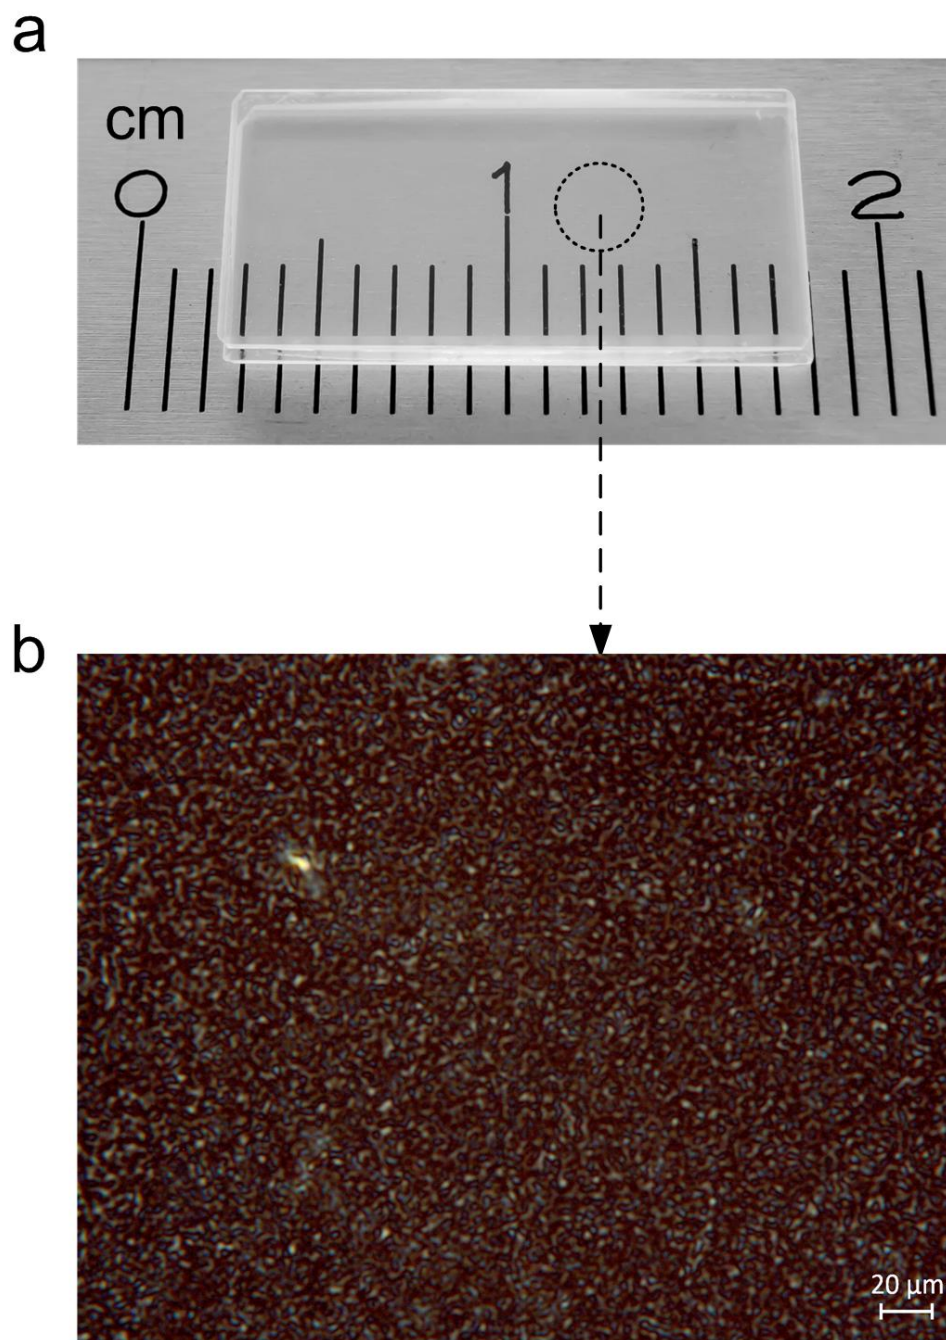

**Fig. S2** (a) Photographic image of the 20  $\mu\text{m}$  thick vitrified  $\text{Eu}(\text{DK}_{12-14})_3\text{phen}$  film sandwiched between two quartz plates with a size of  $7 \times 15 \times 0.5$  mm in daylight. Dashed ring indicates exposed surface area of the film. (b) Room temperature POM image of surface area of the  $\text{Eu}(\text{DK}_{12-14})_3\text{phen}$  film viewed under crossed polarizers and 500 $\times$  magnification.

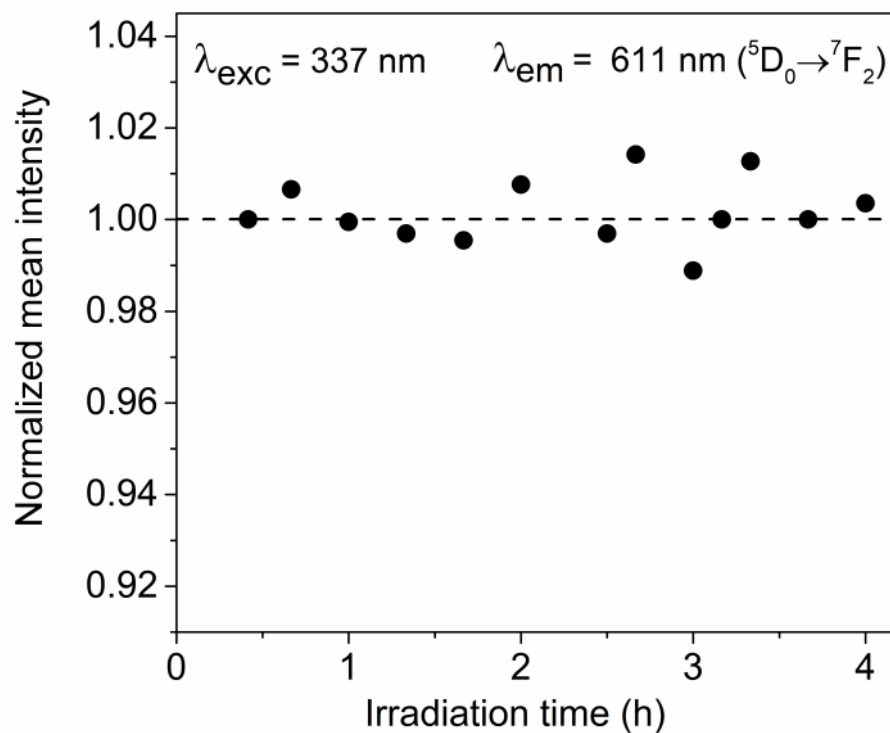

**Fig. S3** Dependence of the normalized mean luminescence intensity of the 20  $\mu\text{m}$  thick vitrified  $\text{Eu}(\text{DK}_{12-14})_3\text{phen}$  film monitored at  $\lambda_{\text{em}} = 611 \text{ nm}$  on the irradiation time by a 337 nm pulsed nitrogen laser with 0.05 mW average output power at room temperature. The solid circles are experimental data. The observed random changes in luminescence intensity are attributed to the instability of the laser (normally no more than 5%) operating on such long time interval.

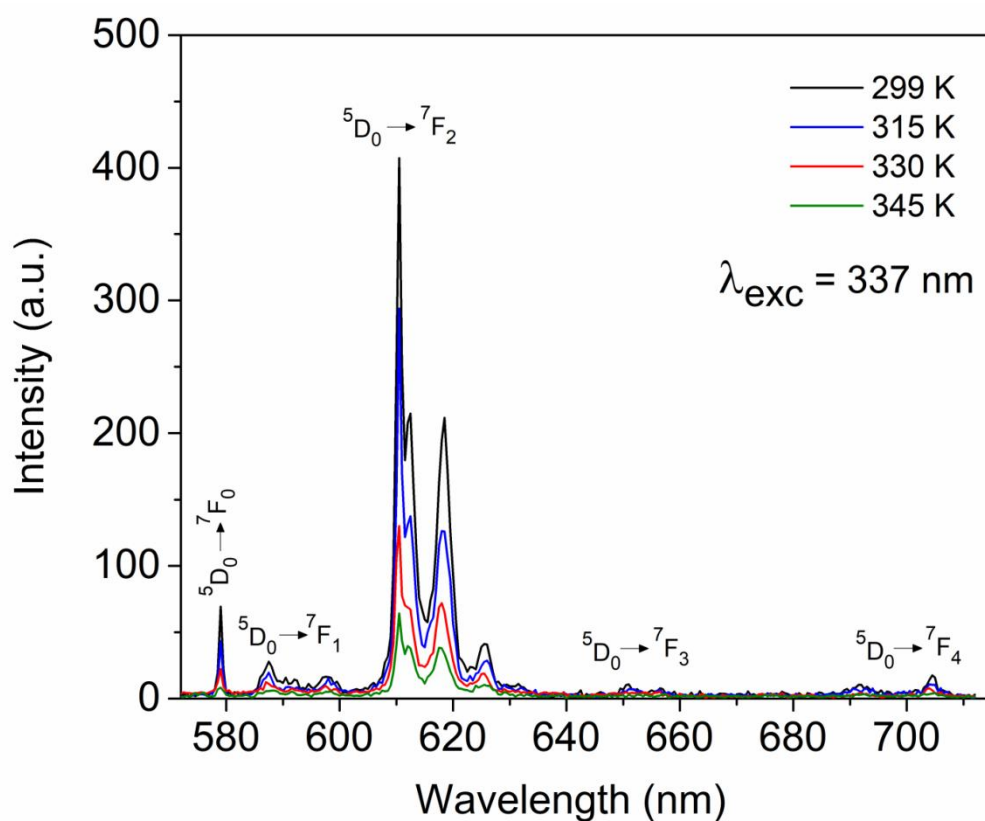

**Fig. S4** Temperature dependence of the time-delayed luminescence spectrum of the 20  $\mu\text{m}$  thick vitrified  $\text{Eu}(\text{DK}_{12-14})_3\text{phen}$  film under the excitation by a 337 nm pulsed nitrogen laser with 0.05 mW average output power (the time delay is 10  $\mu\text{s}$ ).

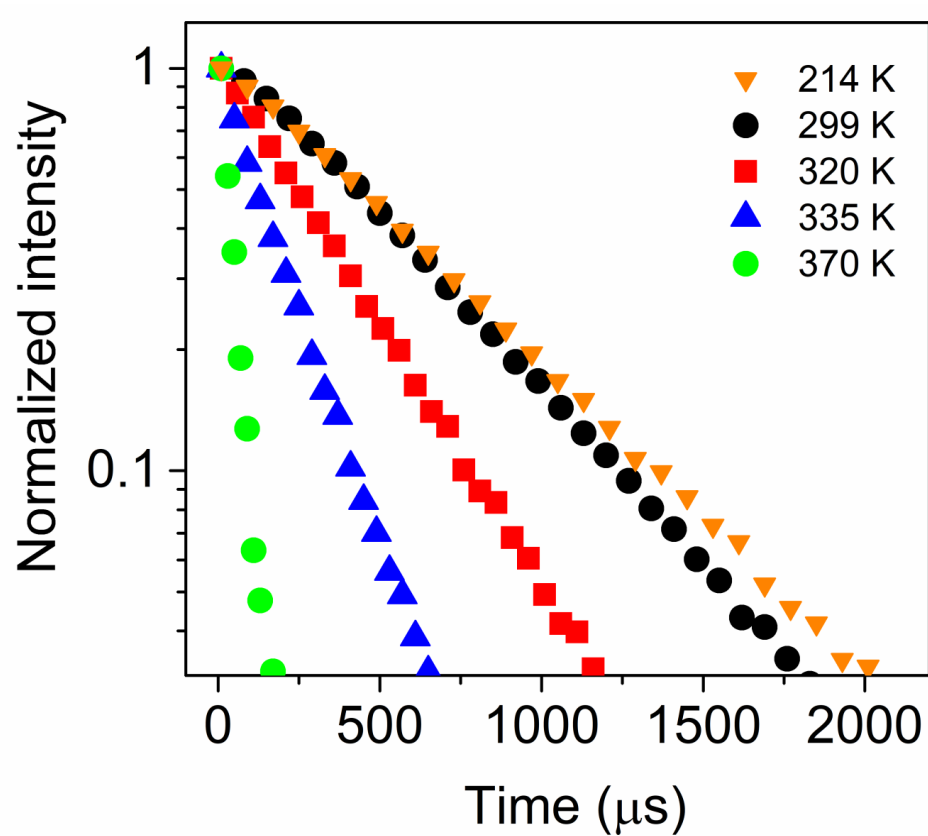

**Fig. S5** Effect of temperature on the luminescence decay curve ( $\lambda_{\text{exc}}=337$  nm,  $\lambda_{\text{em}}=611$  nm) of the 20  $\mu\text{m}$  thick vitrified  $\text{Eu}(\text{DK}_{12-14})_3\text{phen}$  film.

**Table S1** Parameters of the function  $I(t) = A\exp(-t / \tau_{obs})$  fitting the luminescence decay curve ( $\lambda_{em}=611$  nm) of the 20  $\mu\text{m}$  thick vitrified  $\text{Eu}(\text{DK}_{12-14})_3\text{phen}$  film at different temperatures.

| Temperature (K) | A               | $\tau$ ( $\mu\text{s}$ ) | Correlation regression coefficient $r^2$ | Goodness-of-fit parameter $\chi^2$ , $10^{-6}$ |
|-----------------|-----------------|--------------------------|------------------------------------------|------------------------------------------------|
| 214             | 1.1 $\pm$ 0.001 | 580 $\pm$ 1.2            | 0.99951                                  | 23                                             |
| 233             | 1 $\pm$ 0.001   | 575 $\pm$ 0.9            | 0.99968                                  | 15                                             |
| 254             | 1 $\pm$ 0.001   | 574 $\pm$ 0.8            | 0.99974                                  | 11                                             |
| 270             | 1 $\pm$ 0.001   | 561 $\pm$ 0.9            | 0.99968                                  | 14                                             |
| 293             | 1 $\pm$ 0.001   | 533 $\pm$ 0.8            | 0.9997                                   | 12                                             |
| 299             | 1.1 $\pm$ 0.002 | 525 $\pm$ 1.6            | 0.99905                                  | 51                                             |
| 305             | 1.1 $\pm$ 0.002 | 484 $\pm$ 1.2            | 0.99934                                  | 32                                             |
| 310             | 1.1 $\pm$ 0.001 | 438 $\pm$ 0.9            | 0.99952                                  | 21                                             |
| 315             | 1 $\pm$ 0.001   | 385 $\pm$ 0.7            | 0.9997                                   | 12                                             |
| 320             | 1 $\pm$ 0.001   | 331 $\pm$ 0.5            | 0.99974                                  | 9                                              |
| 325             | 1 $\pm$ 0.001   | 269 $\pm$ 0.4            | 0.99976                                  | 7                                              |
| 330             | 1 $\pm$ 0.002   | 217 $\pm$ 0.5            | 0.99956                                  | 15                                             |
| 335             | 1 $\pm$ 0.002   | 175 $\pm$ 0.6            | 0.99956                                  | 22                                             |
| 340             | 1 $\pm$ 0.003   | 139 $\pm$ 0.6            | 0.99848                                  | 33                                             |
| 345             | 1 $\pm$ 0.004   | 109 $\pm$ 0.7            | 0.99863                                  | 45                                             |
| 350             | 1.1 $\pm$ 0.005 | 88 $\pm$ 0.6             | 0.99842                                  | 47                                             |
| 355             | 1.1 $\pm$ 0.01  | 68 $\pm$ 0.7             | 0.99779                                  | 78                                             |
| 360             | 1.1 $\pm$ 0.004 | 55 $\pm$ 0.4             | 0.99888                                  | 35                                             |
| 365             | 1.2 $\pm$ 0.01  | 44 $\pm$ 0.6             | 0.99779                                  | 92                                             |
| 370             | 1.3 $\pm$ 0.02  | 37 $\pm$ 0.6             | 0.99609                                  | 142                                            |

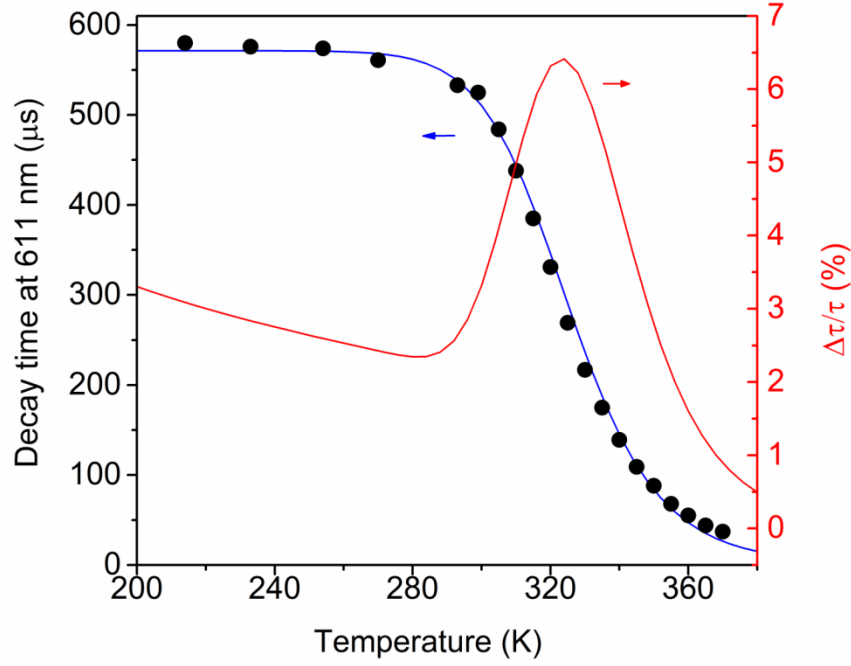

**Fig. S6** Temperature-dependent luminescence decay time (monitored at  $\lambda_{em}= 611$  nm) of the Eu(DK<sub>12-14</sub>)<sub>3</sub>phen film (solid circles are experimental data, blue line is simulation) under the excitation by a 337 nm pulsed nitrogen laser with 0.05 mW average output power and calculated luminescence decay time uncertainty (red line).

To simulate the observed luminescence decay time dependence on temperature  $\tau_{obs}(T)$  we use a well-known function:

$$\tau_{obs}(T) = \left( K + R \cdot \exp\left(-\frac{E}{kT}\right) \right),$$

where  $K$  is the rate constant,  $R$  is the pre-exponential factor,  $E$  is the activation energy and  $k$  is the Boltzmann's constant. Variation of the  $K$ ,  $R$  and  $E$  constants makes possible to derive their values and roughly estimate their absolute measurement errors:  $K \pm \Delta K = 174 \pm 2$  ( $10^3$  s<sup>-1</sup>),  $R \pm \Delta R = 14 \pm 1$  ( $10^{13}$  s<sup>-1</sup>),  $E \pm \Delta E = 5694 \pm 28$  cm<sup>-1</sup>. In that case, the absolute error for indirect measurement  $\tau_{obs}(T)$  is defined by the expression:

$$\Delta\tau_{obs}(T) = \left( \left( \frac{\partial\tau_{obs}(T)}{\partial K} \Delta K \right)^2 + \left( \frac{\partial\tau_{obs}(T)}{\partial R} \Delta R \right)^2 + \left( \frac{\partial\tau_{obs}(T)}{\partial E} \Delta E \right)^2 + \left( \frac{\partial\tau_{obs}(T)}{\partial T} \Delta T \right)^2 \right)^{1/2},$$

where  $\Delta T$  is constant and equals to 1 K for our experimental set up. The calculated relative measurement error  $\Delta\tau_{obs}/\tau_{obs}$  is shown in Fig. S5 together with observed temperature dependence of the luminescence decay time  $\tau_{obs}(T)$ .
